# Supplementary material
Source: Springer Nature journal article supplement (https://www.springermedizin.de/resource/supplementary/13048_2008_13_MOESM3_ESM.pdf/9664746)

2223

112D

1946

Relative fold induction

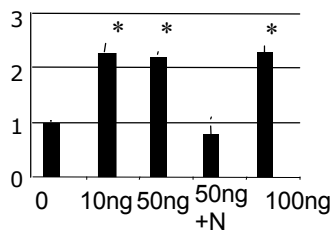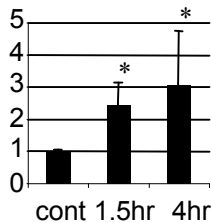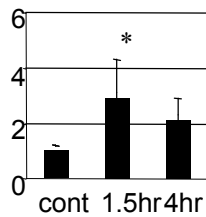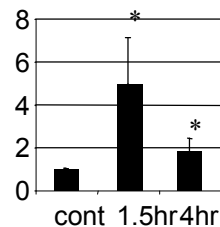

Id1

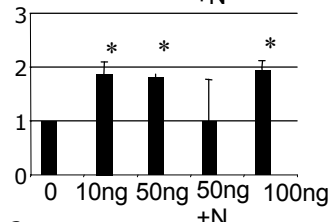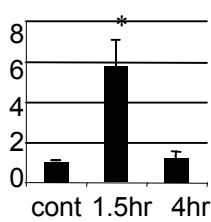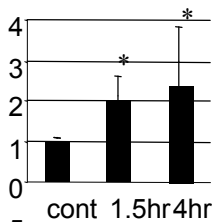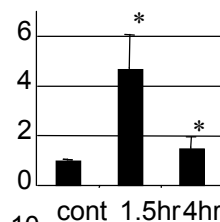

Snail

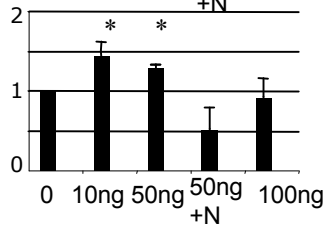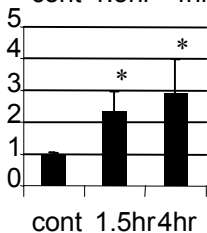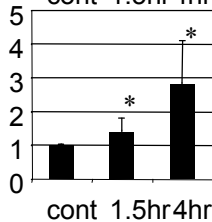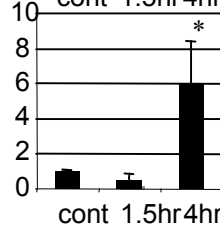

Smad6

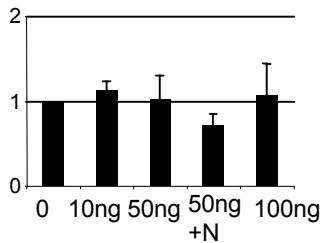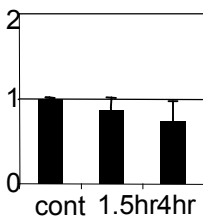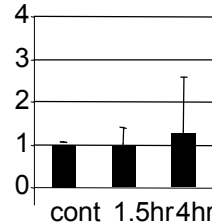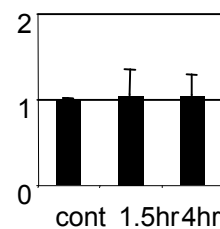

Wnt5a

Supplement: MOESM3 [file 9664746]
